# Supplementary material for: An affordable 3D-printed positioner fixture improves the resolution of conventional milling for easy prototyping of acrylic microfluidic devices
Source: Royal Society of Chemistry journal article supplement (doi:10.1039/d0lc00549e), 2020-01-01
Supplement: d0lc00549e1.pdf [file d0lc00549e1.pdf]

## Supplementary Information for

# An affordable 3D-printed positioner fixture improves the resolution of conventional milling for easy prototyping of acrylic microfluidic devices

Pablo E. Guevara-Pantoja, Oriana G. Chavez-Pineda, Alberto M. Solis-Serrano,  
Jose L. García-Cordero\* and Gabriel A. Caballero-Robledo\*

Unidad Monterrey, Centro de Investigación y de Estudios Avanzados del Instituto  
Politécnico Nacional (Cinvestav), Parque PIIT, Apodaca, Nuevo León 66628, México

\*Corresponding authors: [jlgarcia@cinvestav.mx](mailto:jlgarcia@cinvestav.mx), [gcaballero@cinvestav.mx](mailto:gcaballero@cinvestav.mx)

### 1. Diagram of the control and sensor monitoring system

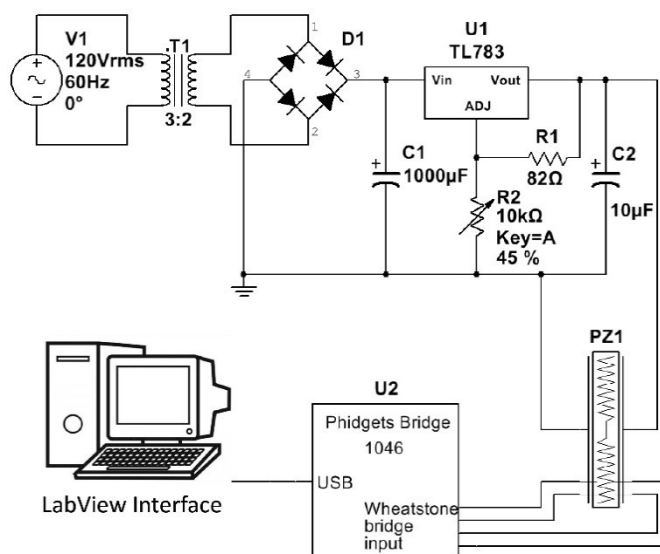

**Fig S1.** Diagram of the control and sensor monitoring system of the piezoelectric actuators (U1 voltage regulator, U2 Wheatstone bridge reader, PZ1 piezoelectric actuator).

## 2. Manufacturing of the immunoassay chip

### 2.1 Micromilling

The fabrication of the immunoassay device starts off by cutting out two PMMA (ME303018, Goodfellow, USA) slabs of 1 x 2.5 cm in the milling machine (MDX-40A, Roland AG, Germany). Then, one slab is placed on the piezoelectric platform with double sided adhesive tape (Tuk, 404, Mexico). The X and Y machine origin are set to match the lower right corner of the slab. The Z origin is set to 50-100 $\mu$ m below the surface of the slab.

The next step consists in leveling the PMMA surface to the new Z origin established in the previous step, **Figure S3a**. This step ensures a precise positioning of the chip relative to the machine. To avoid losing this calibration step due to inaccurate movements produced by the machine's proprietary software (as a home return), we performed the subsequent steps with a numerical control code (G code).

To mill each weir filter (**Figure S3b**), the drill bit is moved to location where the weir filter will be without moving the Z axis. Next, the spindle is set at 15000 rpm, the piezoelectric platform is raised to 5 $\mu$ m and the microchannel carved out by moving the Y axis to the end of the weir filter. This process is repeated for each weir filter.

Finally, the 100  $\mu$ m depth channels are machined with the milling machine's proprietary software (Dr.Engrave) according to the design shown in **Figure S2**. A 200  $\mu$ m drill bit (Kyocera, 1600-0080L012) is used for the channels (**Figure S3c**) while a 0.8 mm drill bit (Kyocera, 1600-0320L048, USA) is used for drilling access holes (**Figure S3d**). Next, the chip is removed from the milling machine, washed with isopropanol and dried with nitrogen.

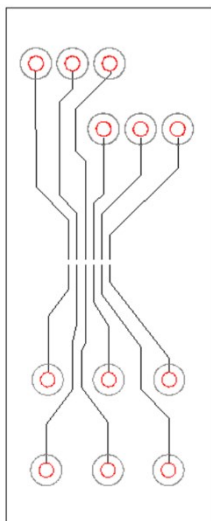

**Figure S2.** Design of the microfluidic immunoassay chip that is used in the proprietary software for the last two steps.

## 2.2 Bonding protocol

The bonding of the two acrylic layers is achieved using a solvent method. First, 1 ml of chloroform is deposited in a 100 mm Petri dish and left still for 5 min to saturate its interior with chloroform vapor, **Figure S3e**. Then, using double-sided adhesive tape (Tuk, 404, Mexico) the acrylic pieces are glued to the lid of the petri dish and exposed to the chloroform vapor for 1 min. It is essential to leave a gap of 7.5 mm between the surface of the acrylic and the solvent surface. Next, the pieces are incubated for 5 min in an atmosphere without chloroform. Finally, the treated pieces are pressed together at 250 psi and 90°C for 10 min using a home-made mechanical press, **Figure S3f**. (section 2.3 Mechanical press).

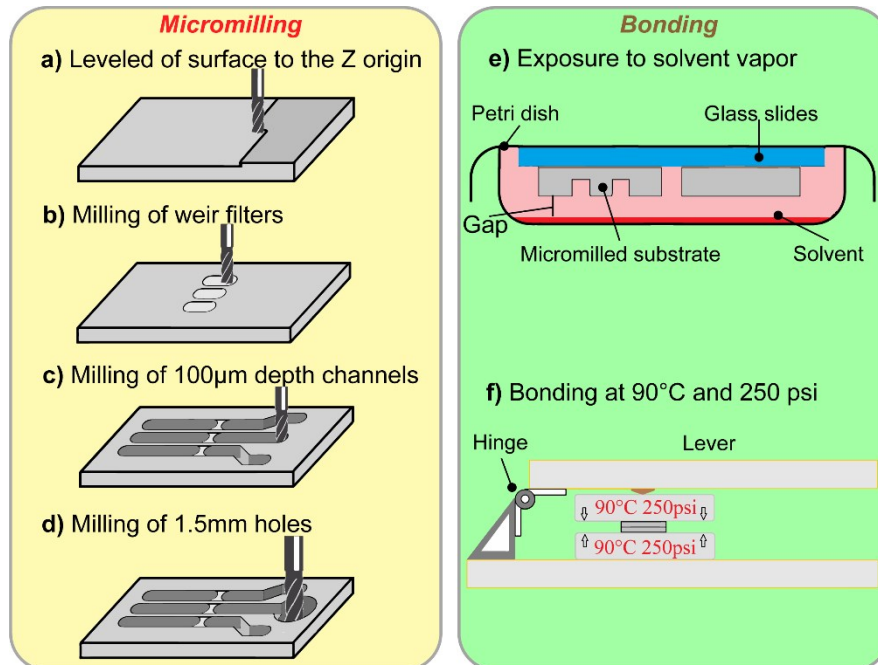

**Figure S3.** Schematic representation of the immunoassay chip manufacturing steps.

## 2.3 Mechanical press

The mechanical press is based on a lever with an amplification factor of 1:10. To reach 17.5 Kg/cm<sup>2</sup> (250 psi) of pressure on the chip; we have to apply a force of 43.75 Kgf on an area of 2.5cm<sup>2</sup>, this translates into a mass of 4.37 kg on the lever. To control the temperature, we used a pair of 200W heaters (DBK, PCT heaters HP06-2/20-240) and a PID controller (Autonics, TC4Y-N4R) with a K type thermocouple.

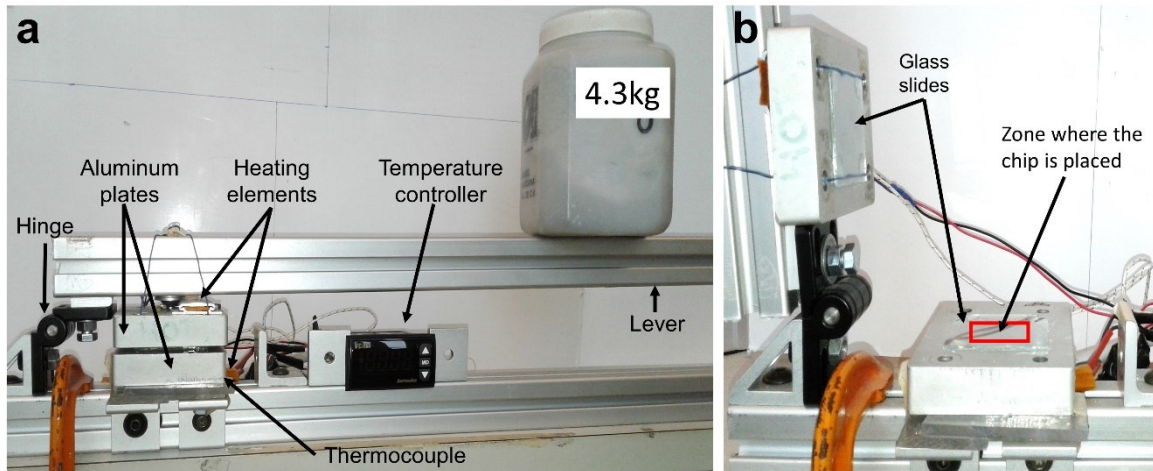

**Figure S4.** (a) Photographs of the mechanical press and (b) close-up to the bonding plates.

### 3. Review of advantages and disadvantages of different microfabrication methods

| 1-10um microfabrication technology | Resolution                    | Equipment cost                                           | Time                         | comments                                                                  |
|------------------------------------|-------------------------------|----------------------------------------------------------|------------------------------|---------------------------------------------------------------------------|
| <b>Soft lithography</b>            | >submicron range              | > 15k \$ without mold fabrication equipment <sup>4</sup> | 0.5-1hr to replicate a mold  | Expensive <sup>5</sup> molds made by lithography, slow prototyping        |
| <b>High-end CNC</b>                | >submicron range <sup>6</sup> | >100k \$ <sup>7</sup>                                    | 5-30 min                     | Channels <sup>5</sup> limited by drill bit size                           |
| <b>Hot embossing</b>               | >submicron range              | >20k \$                                                  | 10-30min to replicate a mold | Mold is expensive to fabricate, slow prototyping <sup>8</sup>             |
| <b>microinjection</b>              | >submicron range              | >50k \$                                                  | 10-30 seg                    | Long prototyping time <sup>8</sup>                                        |
| <b>High-resolution 3D printing</b> | >submicron range              | In development <sup>9</sup>                              | 5-10 hr                      | Limited to small pieces <sup>10</sup> , low biocompatibility <sup>2</sup> |
| <b>Laser-cut</b>                   | >micron range                 | <10k \$                                                  | 0.5-1hr                      | X, Y plane low resolution, cuts of >100μm <sup>3</sup>                    |
| <b>CNC with our fixture</b>        | >micron range                 | <10k \$                                                  | 5-30 min                     | Channels <sup>5</sup> limited by drill bit size                           |

**Table S1. Comparison of other fast prototyping techniques for microfluidic devices**

**References**

- 1 J. Jiang, J. Zhan, W. Yue, M. Yang, C. Yi and C.-W. Li, *RSC Adv.*, 2015, **5**, 36036–36043.
- 2 A. Lashkaripour, R. Silva and D. Densmore, *Microfluid. Nanofluidics*, 2018, **22**, 31.
- 3 C. W. Tsao, *Micromachines*, 2016, **7**, 225.
- 4 3D Elastomeric Scaffolds Fabricated by Casting in Micro End Milled Moulds | Scientific.Net, <https://www.scientific.net/JBBTE.9.17>, (accessed 26 June 2020).
- 5 D. J. Guckenberger, T. de Groot, A. M.-D. Wan, D. Beebe and E. Young, *Lab Chip*, 2015, **15**, 2364–2378.
- 6 E. Berthier, E. W. K. Young and D. Beebe, *Lab Chip*, 2012, **12**, 1224–1237.
- 7 A. Ahmadian Yazdi, A. Popma, W. Wong, T. Nguyen, Y. Pan and J. Xu, *Weibel and White-sides*, , DOI:10.1007/s10404-016-1715-4.
- 8 S. Bohne, M. Heymann, H. N. Chapman, H. K. Trieu and S. Bajt, *Rev. Sci. Instrum.*, 2019, **90**, 035108.
- 9 A. K. Au, W. Huynh, L. F. Horowitz and A. Folch, *Angew. Chemie - Int. Ed.*, 2016, **55**, 3862–3881.
- 10 D. Patko, Z. Mártonfalvi, B. Kovacs, F. Vonderviszt, M. Kellermayer and R. Horvath, *Sensors Actuators, B Chem.*, 2014, **196**, 352–356.
